# Supplementary material for: Whole-Genome Analysis of Mycobacterium neoaurum DSM 1381 and the Validation of Two Key Enzymes Affecting C22 Steroid Intermediates in Sterol Metabolism
Source: MDPI journal article supplement (doi:10.3390/ijms24076148), 2023-03-24
Supplement: s1 [file s1]

Table S1. Polymorphisms in gene sequences of *M. neoaurum* DSM 1381.

| Description of Gene Product                                    | Gene ID   |          | SNV        |            | aa mutation   |               |
|----------------------------------------------------------------|-----------|----------|------------|------------|---------------|---------------|
|                                                                | DSM 43536 | DSM 1381 | DSM 43536  | DSM 1381   | DSM 43536     | DSM 1381      |
| <b>Nonsynonymous SNV</b>                                       |           |          |            |            |               |               |
| KshA1                                                          | 807       | 14       | 517A       | 517G       | 173Asn        | 173Asp        |
| Hsd4A                                                          | 775       | 46       | 511A       | 511G       | 171Lys        | 171Glu        |
| ribonuclease                                                   | 446       | 372      | 152T       | 152A       | 51Ile         | 51Asn         |
| oxidoreductase FmdB family transcriptional regulator           | 441       | 377      | 26T        | 32C        | 9Leu          | 11Pro         |
| oxidoreductase                                                 | 328       | 485      | 159C       | 159G       | 53Try         | 53TAG         |
| ferrochelataase                                                | 894       | 878      | 49T;50C    | 49C;50A    | 17Ser         | 17His         |
| dihydroxy-acid dehydratase                                     | 984       | 965      | 321G       | 321C       | 107Met        | 107Ile        |
| MFS transporter                                                | 1005      | 986      | 120A       | 120G       | 40Ile         | 40Met         |
| HNH endonuclease                                               | 1309      | 1278     | 512A;1234C | 512C;1234A | 171Lys;412Pro | 171Thr;412Thr |
| NAD(P)/FAD-dependent oxidoreductase                            | 1328      | 1296     | 1025C      | 1025G      | 342Ala        | 342Gly        |
| MMPL family transporter                                        | 1490      | 1454     | 2900C      | 2900T      | 967Ser        | 967Leu        |
| D-glycero-beta-D-manno-heptose 1-phosphate adenylyltransferase | 1739      | 2086     | 950T       | 950G       | 317Leu        | 317Trp        |
| peptidase M4, thermolysin                                      | 1875      | 1953     | 3781A      | 3781G      | 1261Ile       | 1261Val       |
| FadR family transcriptional regulator                          | 2235      | 2188     | 446T       | 446A       | 149Leu        | 149Gln        |
| DUF4192 domain-containing protein                              | 2366      | 2319     | 587C       | 587G       | 196Ala        | 196Gly        |
| hypothetical protein                                           | 3271      | 3077     | 275C; 278T | 245T; 248C | 82Ser;83Phe   | 82Phe;83Ser   |
| LytR family transcriptional regulator                          | 3572      | 3454     | 77G        | 77A        | 26Arg         | 26His         |
| UPF0182 family protein                                         | 3671      | 3549     | 883C       | 883G       | 295Arg        | 295Gly        |
| thioredoxin-dependent thiolperoxidase                          | 3744      | 3654     | 230A       | 230G       | 77Lys         | 77Arg         |

| Description of Gene Product                               | Gene ID   |           | SNV          |              | aa mutation   |               |
|-----------------------------------------------------------|-----------|-----------|--------------|--------------|---------------|---------------|
|                                                           | DSM 43536 | DSM 1381  | DSM 43536    | DSM 1381     | DSM 43536     | DSM 1381      |
| extracellular solute-binding protein                      | 3937      | 3761      | 1034T        | 1034G        | 345Val        | 345Gly        |
| MBL fold metallo-hydrolase                                | 4053      | 4069      | 751C         | 700A         | 234Pro        | 234Thr        |
| sensor histidine kinase                                   | 4084      | 4099      | 421C         | 421G         | 141His        | 141Asp        |
| agmatine dei minase family protein                        | 4341      | 4344      | 250G         | 250A         | 84Asp         | 84Asn         |
| virulence factor <i>mce</i> family protein                | 4358      | 4329      | 944T         | 962C         | 321Val        | 321Ala        |
| HNH endonuclease                                          | 5068      | 3200      | 326C;380C    | 326G;380A    | 109Ala;127Thr | 109Gly;127Lys |
| alpha/beta hydrolase/acetyl esterase/lipase               | 5160      | 5044      | 154G         | 154A         | 52Glu         | 52Lys         |
| YVTN beta-propeller repeat-containing protein             | 1875      | 1953      | 4201A        | 3781G        | 1261Ile       | 1261Val       |
| SDR family NAD(P)-dependent oxidoreductase                | 1151      | 1123      | upstream 34G | upstream 34T |               |               |
| <b>Synonymous SNV</b>                                     |           |           |              |              |               |               |
| hypothetical protein                                      | 802       | 59        | 3138C        | 3138T        | 1046Phe       | 1046Phe       |
| MogA/MoaB family molybdenum cofactor biosynthesis protein | 447       | 371       | 474C         | 474T         | 158Ile        | 158Ile        |
| hypothetical protein                                      | 208       | 602       | 1140C        | 1140T        | 380Arg        | 380Arg        |
| apolipoprotein N-acyltransferase                          | 1068      | 1047      | 1272C        | 1272T        | 424Ile        | 424Ile        |
| cupin domain-containing protein                           | 1560      | 1522      | 360C         | 360T         | 120Phe        | 120Phe        |
| 4-hydroxy-2-oxopentanoic acid aldolase                    | 1271      | 1243      | 327G         | 327C         | 109Arg        | 109Arg        |
| 3-ketoacyl-(acyl-carrier-protein) reductase               | 4311      | 4374      | 549G         | 549A         | 183Leu        | 183Leu        |
| MMPL family transporter                                   | 4817      | 4835      | 723C         | 723T         | 241Phe        | 241Phe        |
| glutamate synthase large subunit                          | 5263      | 5153      | 3156G        | 3156A        | 1052Gln       | 1052Gln       |
| benzoylsuccinyl-CoA thiolase                              | 5338      | 5225;5228 | 255G;256T    | 255A;256C    | 85Glu;86Leu   | 85Glu;86Leu   |

**Table S2.** Gaps/Inserts in gene sequences of *M. neoaurum* DSM 1381.

| <b>Indels</b>                                                             | <b>DSM 43536</b> | <b>DSM 1381</b> | <b>Indels in DSM 1381</b> | <b>Mutation start position</b> |
|---------------------------------------------------------------------------|------------------|-----------------|---------------------------|--------------------------------|
| <b>Coding region</b>                                                      |                  |                 |                           |                                |
| acyltransferase                                                           | 187              | 624             | gap, 1bp                  | 461                            |
| type I polyketide synthase                                                | 905-906          | 888             | insert, 802bp             | 1434                           |
| YVTN beta-propeller repeat-containing protein                             | 1875             | 1953            | gap, 324bp                | 2262                           |
| inner membrane protein YhjD                                               | 2089-2090        | 1741            | gap, 40bp                 | 558                            |
| 2,4-dienoyl-CoA reductase                                                 | 2435             | 2389            | insert, 4bp               | 660                            |
| peptidyl-prolyl cis-trans isomerase                                       | 2469             | 2422            | gap, 36bp                 | 613                            |
| acyl-CoA synthetase                                                       | 2617-2616        | 2573            | gap, 34bp                 | 807                            |
| Rne/Rng family ribonuclease                                               | 2828             | 2905            | insert, 15bp              | 2874                           |
| hypothetical protein                                                      | 3137             | 3380            | gap, 64bp                 | 423                            |
| hypothetical protein                                                      | 3837             | 3857            | gap, 39bp                 | 315                            |
| hypothetical protein                                                      | 3937             | 3761            | insert, 20bp              | 1054                           |
| alcohol dehydrogenase                                                     | 4085             | 4101            | insert, 1bp               | 989                            |
| HNH endonuclease                                                          | 4402             | 4285            | gap, 53bp                 | 79                             |
| HNH endonuclease                                                          | 4563-4564        | 4605            | gap, 47bp                 | 1205                           |
| HNH endonuclease                                                          | 5002             | 3922            | gap, 58bp                 | 200                            |
| membrane protein                                                          | 5079             | 3189            | gap, 38bp                 | 366                            |
| methyltransferase                                                         | 5153             | 5051            | gap, 2bp                  | 37                             |
| <b>Non-coding region</b>                                                  |                  |                 |                           |                                |
| Inactive dihydropteroate synthase 2; glucosyl-3-phosphoglycerate synthase | 130-131          | 679-678         | gap, 103bp                | upstream,downstream            |
| coumarate CoA ligase family protein; methionine synthase                  | 1595-1593        | 1557-1555       | gap, 36bp                 | downstream,<br>downstream      |

| Indels                                                            | DSM 43536 | DSM 1381  | Indels in DSM 1381   | Mutation start position   |
|-------------------------------------------------------------------|-----------|-----------|----------------------|---------------------------|
| PucR family transcriptional regulator; 2-nitropropane dioxygenase | 2092-2093 | 1738-1739 | gap, 36bp            | downstream,<br>downstream |
| NAD(P)H-quinone dehydrogenase; gamMa-glutamyl<br>cyclotransferase | 2132-2133 | 1698-1699 | gap, 35bp            | upstream, upstream        |
| 4a-hydroxytetrahydrobiopterin dehydratase; proline--tRNA ligase   | 2247-2248 | 2200-2201 | gap, 33bp            | downstream, upstream      |
| hypothetical protein; VWA domain-containing protein-4102          | 4086-4085 | 4102-4101 | gap, 33bp            | downstream, upstream      |
| MinD/ParA family protein; DUF4229 domain-containing protein       | 4148-4149 | 4161-4162 | gap, 43bp; gap, 13bp | downstream, upstream      |
| RDD family protein; hypothetical protein                          | 3402-3403 | 4713-4714 | gap, 66bp            | upstream,downstream       |

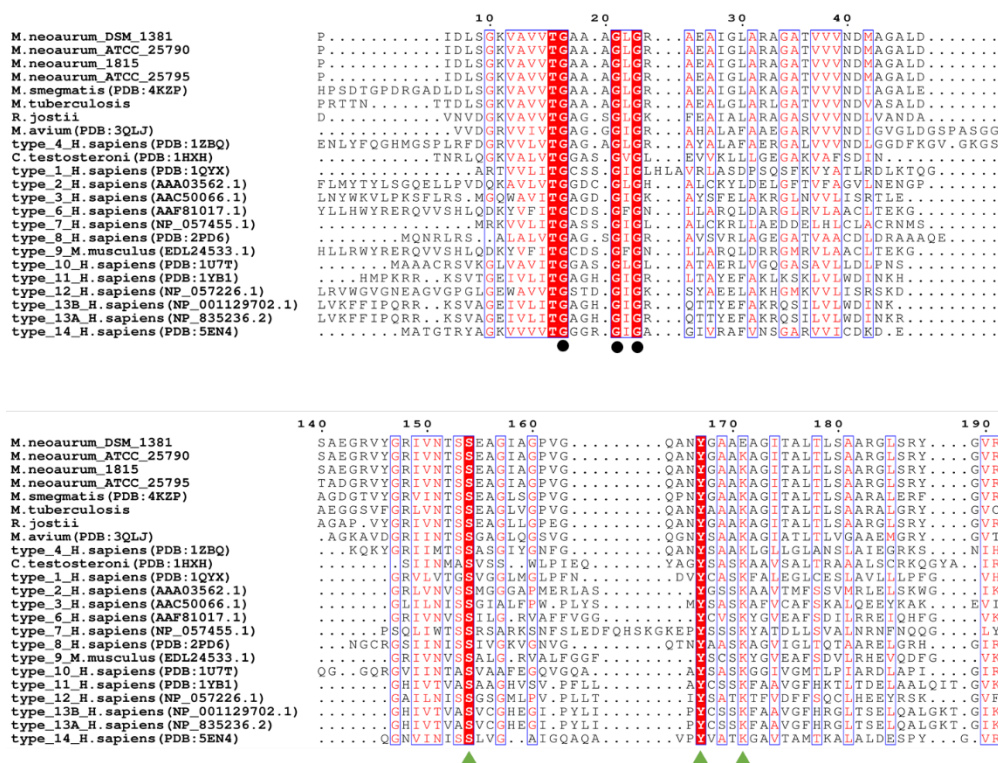

Figure S1. Alignment of Hsh4A homologs amino acid sequence.

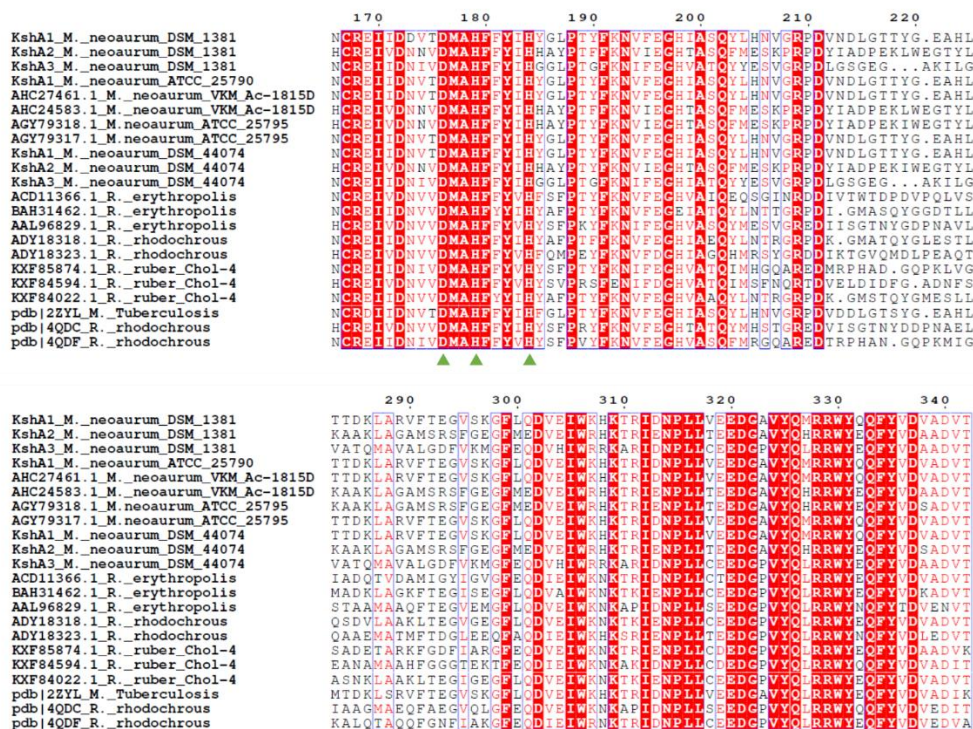

Figure S2. Alignment of KshA homologs amino acid sequence.
